# Supplementary material for: Performance evaluation of UKESM1 for surface ozone across the pan-tropics
Source: Copernicus journal article supplement (doi:10.5194/acp-24-12537-2024), 2024-11-13
Supplement: Supplementary file 1 [file acp-24-12537-2024-supplement.pdf]

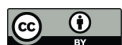

*Supplement of*

## **Performance evaluation of UKESM1 for surface ozone across the pan-tropics**

**Flossie Brown et al.**

*Correspondence to:* Flossie Brown ([florencealice.brown@env.ethz.ch](mailto:florencealice.brown@env.ethz.ch))

The copyright of individual parts of the supplement might differ from the article licence.

## Supplementary

### Site descriptions

#### *Congo*

The CongoFlux station is located at the Research Centre of Yangambi (“Centre de Recherche de Yangambi” - CRY) in the Congo basin in a mixed semi-deciduous forest. The site is to the right of the Congo river, ~100 km northwest of the city Kisangani (Sibret et al., 2022). The ozone monitor is installed at 56.25 m above ground (Vieira et al., 2023).

#### *Jakarta*

The three stations in this area are located within major cities. Two are in Jakarta, the largest city in Indonesia, previously identified as having high air pollution from traffic. The stations are located in central Jakarta at the curbside, and in a commercial area (Suhadi et al., 2005). In the same gridcell, a third ozone monitor is located in Bandung, the third largest city in Indonesia, which also suffers from poor air quality. The city is surrounded by volcanic mountains which can trap air and worsen air quality (Setyawati et al., 2022). The station is on top of a three-storey building near roads with heavy traffic (Komala et al., 1996).

#### *Bukit Koto Tabang*

This station is located in remote tropical rainforest as part of the Global Atmospheric Watch (GAW) programme (Utami et al., 2021).

#### *Watukosek*

This is a rural station on eastern Java Island in the outskirts of Surabaya, the second largest city in Indonesia. The station is 50 m above mean sea level on the slope of a small hill. The surrounding area includes coast (20 km away) and trees (Komala et al., 1996), and is likely to be influenced by regional biomass burning (Adedeji et al., 2020).

#### *Darwin*

These stations are located in Winnellie and in the satellite city of Palmerston. They are primarily to monitor urban air pollution. The city is coastal.

#### *Daintree*

This station is located in the James Cook University’s Daintree Rainforest Observatory in the Australian Wet Tropics of northeast Queensland. The station is surrounded by rainforest. The surrounding area is coastal and lowland but adjacent to upland rainforest and mountain.

#### *Panama*

The station is situated on a 16 km<sup>2</sup> island of Barro Colorado in Panama. The site is surrounded by lowland tropical rainforest.

#### *Bogotá*

A network (RMCAB) of stations spanning urban Bogotá. Additionally, 2 stations from Medellín and 1 in Manizales also contribute to the site average (Mura et al., 2020).

### *Porto Velho*

This station is in a forest reserve upwind of Porto Velho city. The site has undergone significant land-use change and experiences seasonal biomass burning. Measurements are taken at 40 m above the ground (~10 m above the canopy).

### *Amazonas*

This site contains a few monitoring stations in the state of Amazonas at different heights. The stations were set up as part of the GOAmazon project (Martin et al., 2017). The site includes a station in Manaus (T1), two stations downwind of Manaus (T2 and T3) as well as upwind locations (T0z, the site of the TT34 flux tower). In the absence of the Manaus city, this is pristine, primary forest with little influence from local biomass burning. However, pollution sources include the area downwind of the Manaus city plume, transport of air masses from Africa and dry season biomass burning. The plume from Manaus first travels to the T2 station ~ 7 km from the city. The T3 station is located ~60 km downwind of the plume, with pollution expected to reach the tower 60 % of the time during dry season. The pristine site T0z is 60 km NW of Manaus and measurements are taken at 40 m above ground level (Martin et al., 2010). The T1 station is on the Manaus University campus.

### *San Lorenzo*

This station is another regional background station set up as part of the GAW monitoring network.

### *Santarem*

This site is an old-growth evergreen tropical rainforest station in the Tapajos National park. The station was established at a flux site (Rice et al., 2004) on a large plateau. The ozone monitoring station is at 65 m above ground (~25 m above the canopy).

### *São Paulo*

A network of 19 stations covering the Metropolitan centre of São Paulo as well as suburban areas. Stations are provided by CETESB (<https://cetesb.sp.gov.br/ar/qualar/>).

## References

Adedeji, A. R., Dagar, L., Petra, M. I., and Silva, L. C. D.: Sensitivity of WRF-Chem model resolution in simulating tropospheric ozone in Southeast Asia, IOP Conf. Ser.: Earth Environ. Sci., 489, 012030, <https://doi.org/10.1088/1755-1315/489/1/012030>, 2020.

Komala, N., Saraspriya, S., Kita, K., and Ogawa, T.: Tropospheric ozone behavior observed in Indonesia, Atmospheric Environment, 30, 1851–1856, [https://doi.org/10.1016/1352-2310\(95\)00382-7](https://doi.org/10.1016/1352-2310(95)00382-7), 1996.

Martin, S. T., Andreae, M. O., Althausen, D., Artaxo, P., Baars, H., Borrmann, S., Chen, Q., Farmer, D. K., Guenther, A., Gunthe, S. S., Jimenez, J. L., Karl, T., Longo, K., Manzi, A., Müller, T., Pauliquevis, T., Petters, M. D., Prenni, A. J., Pöschl, U., Rizzo, L. V., Schneider, J., Smith, J. N.,

Swietlicki, E., Tota, J., Wang, J., Wiedensohler, A., and Zorn, S. R.: An overview of the Amazonian Aerosol Characterization Experiment 2008 (AMAZE-08), *Atmospheric Chemistry and Physics*, 10, 11415–11438, <https://doi.org/10.5194/acp-10-11415-2010>, 2010.

Martin, S. T., Artaxo, P., Machado, L., Manzi, A. O., Souza, R. a. F., Schumacher, C., Wang, J., Biscaro, T., Brito, J., Calheiros, A., Jardine, K., Medeiros, A., Portela, B., Sá, S. S. de, Adachi, K., Aiken, A. C., Albrecht, R., Alexander, L., Andreae, M. O., Barbosa, H. M. J., Buseck, P., Chand, D., Comstock, J. M., Day, D. A., Dubey, M., Fan, J., Fast, J., Fisch, G., Fortner, E., Giangrande, S., Gilles, M., Goldstein, A. H., Guenther, A., Hubbe, J., Jensen, M., Jimenez, J. L., Keutsch, F. N., Kim, S., Kuang, C., Laskin, A., McKinney, K., Mei, F., Miller, M., Nascimento, R., Pauliquevis, T., Pekour, M., Peres, J., Petäjä, T., Pöhlker, C., Pöschl, U., Rizzo, L., Schmid, B., Shilling, J. E., Dias, M. A. S., Smith, J. N., Tomlinson, J. M., Tóta, J., and Wendisch, M.: The Green Ocean Amazon Experiment (GoAmazon2014/5) Observes Pollution Affecting Gases, Aerosols, Clouds, and Rainfall over the Rain Forest, *Bulletin of the American Meteorological Society*, 98, 981–997, <https://doi.org/10.1175/BAMS-D-15-00221.1>, 2017.

Mura, I., Franco, J. F., Bernal, L., Melo, N., Díaz, J. J., and Akhavan-Tabatabaei, R.: A Decade of Air Quality in Bogotá: A Descriptive Analysis, *Frontiers in Environmental Science*, 8, 2020.

Rice, A. H., Pyle, E. H., Saleska, S. R., Hutyra, L., Palace, M., Keller, M., de Camargo, P. B., Portilho, K., Marques, D. F., and Wofsy, S. C.: Carbon Balance and Vegetation Dynamics in an Old-Growth Amazonian Forest, *Ecological Applications*, 14, 55–71, <https://doi.org/10.1890/02-6006>, 2004.

Setyawati, W., Aries Tanti, D., and Indrawati, A.: Air Quality in the Bandung Basin of Indonesia as Measured by Passive Sampler, in: *Proceedings of the International Conference on Radioscience, Equatorial Atmospheric Science and Environment and Humanosphere Science*, 2021, Singapore, 435–447, [https://doi.org/10.1007/978-981-19-0308-3\\_36](https://doi.org/10.1007/978-981-19-0308-3_36), 2022.

Sibret, T., Bauters, M., Bulonza, E., Lefevre, L., Cerutti, P. O., Lokonda, M., Mbifo, J., Michel, B., Verbeeck, H., and Boeckx, P.: CongoFlux : the first eddy covariance flux tower in the Congo Basin, *FRONTIERS IN SOIL SCIENCE*, 2, <https://doi.org/10.3389/fsoil.2022.883236>, 2022.

Suhadi, D., Awang, M., Hassan, M. N., and Muda, R.: Review of Photochemical Smog Pollution in Jakarta Metropolitan, Indonesia, *American Journal of Environmental Sciences*, 1, <https://doi.org/10.3844/ajessp.2005.110.118>, 2005.

Utami, A. I., Nasution, R. I., and Asnia, M.: Effect of ozone precursors on surface ozone variations in GAW Kototabang and Cibereum, IOP Conf. Ser.: Earth Environ. Sci., 893, 012073, <https://doi.org/10.1088/1755-1315/893/1/012073>, 2021.

Vieira, I., Verbeeck, H., Meunier, F., Peaucelle, M., Sibret, T., Lefevre, L., Cheesman, A. W., Brown, F., Sitch, S., Mbifo, J., Boeckx, P., and Bauters, M.: Global reanalysis products cannot reproduce seasonal and diurnal cycles of tropospheric ozone in the Congo Basin, Atmospheric Environment, 304, 119773, <https://doi.org/10.1016/j.atmosenv.2023.119773>, 2023.

## Figures and tables

**Table S1: information about individual stations at each site. Stations in the same site are identified by colour.**

| Station name                | Latitude / degrees | Longitude / degrees | Gridcell title | urban  | Temporal range |
|-----------------------------|--------------------|---------------------|----------------|--------|----------------|
| <b>Buenaventura</b>         | 6.331              | -75.569             | Bogotá         | urban  | 2013-2014      |
| <b>Parque Las Aguas</b>     | 6.409              | -75.417             | Bogotá         | urban  | 2013-2014      |
| <b>C. Alto Rendimiento</b>  | 4.659              | -74.084             | Bogotá         | urban  | 2008-2014      |
| <b>Carvajal - Sevillana</b> | 4.596              | -74.1486            | Bogotá         | urban  | 2008-2014      |
| <b>Fontibon</b>             | 4.670              | -74.1416            | Bogotá         | urban  | 2008-2014      |
| <b>Guaymaral</b>            | 4.784              | -74.044             | Bogotá         | urban  | 2008-2014      |
| <b>Kennedy</b>              | 4.625              | -74.161             | Bogotá         | urban  | 2008-2014      |
| <b>Las Ferias</b>           | 4.691              | -74.082             | Bogotá         | urban  | 2008-2014      |
| <b>MinAmbiente</b>          | 4.626              | -74.067             | Bogotá         | urban  | 2008-2014      |
| <b>Móvil</b>                | 4.651              | -74.061             | Bogotá         | urban  | 2013-2014      |
| <b>Puente Aranda</b>        | 4.632              | -74.117             | Bogotá         | urban  | 2008-2014      |
| <b>San Cristobal</b>        | 4.573              | -74.084             | Bogotá         | urban  | 2011-2014      |
| <b>Suba</b>                 | 4.761              | -74.093             | Bogotá         | urban  | 2008-2014      |
| <b>Tunal</b>                | 4.576              | -74.131             | Bogotá         | urban  | 2008-2014      |
| <b>Usaquen</b>              | 4.710              | -74.03              | Bogotá         | urban  | 2008-2014      |
| <b>Bukit Koto Tabang</b>    | -0.2               | 100.32              | Bukit Koto     | remote | 1996-2014      |
| <b>Bandung</b>              | -6.894             | 107.587             | Jakarta        | urban  | 1987-2011      |
| <b>Gambir</b>               | -6.1831            | 106.8354            | Jakarta        | urban  | 1997-1999      |
| <b>Kemayoran</b>            | -6.1558            | 106.842             | Jakarta        | urban  | 2000-2014      |
| <b>Watukosek</b>            | -7.5647            | 112.6781            | Watukosek      | urban  | 1987-2011      |
| <b>San Lorenzo</b>          | -25.3667           | -57.55              | San Lorenzo    |        | 1997-2007      |
| <b>Cubato-centro</b>        | -23.8791           | -46.4179            | Sao Paulo      | urban  | 1998-2014      |
| <b>Parelheiros</b>          | -23.7763           | -46.697             | Sao Paulo      | urban  | 2007-2014      |

|                            |          |          |                |        |            |
|----------------------------|----------|----------|----------------|--------|------------|
| <b>Diadema</b>             | -23.6859 | -46.6116 | Sao Paulo      | urban  | 1998-2014  |
| <b>Ibirapuera</b>          | -23.5918 | -46.6607 | Sao Paulo      | urban  | 1998-2014  |
| <b>Ipen</b>                | -23.5663 | -46.7374 | Sao Paulo      | urban  | 2007-2014  |
| <b>Itaquera</b>            | -23.58   | -46.4667 | Sao Paulo      | urban  | 2007-2014  |
| <b>Mauã</b>                | -23.6686 | -46.4653 | Sao Paulo      | urban  | 1998-2014  |
| <b>Mooca</b>               | -23.5497 | -46.6004 | Sao Paulo      | urban  | 1998-2014  |
| <b>Nossa Senhora do ó</b>  | -23.4801 | -46.6921 | Sao Paulo      | urban  | 2004-2014  |
| <b>Osasco</b>              | -23.5267 | -46.7921 | Sao Paulo      | urban  | 1998-2002  |
| <b>Parque D.Pedro II</b>   | -23.5448 | -46.6277 | Sao Paulo      | urban  | 1998-2014  |
| <b>Pinheiros</b>           | -23.5615 | -46.702  | Sao Paulo      | urban  | 1998-2014  |
| <b>S.Andrã-Capuava</b>     | -23.6398 | -46.4916 | Sao Paulo      | urban  | 2000-2014  |
| <b>Santana</b>             | -23.506  | -46.629  | Sao Paulo      | urban  | 1998-2014  |
| <b>Santo Amaro</b>         | -23.655  | -46.71   | Sao Paulo      | urban  | 2002-2014  |
| <b>São Caetano</b>         | -23.6184 | -46.5564 | Sao Paulo      | urban  | 1998-2014  |
| <b>São Josã dos Campos</b> | -23.1885 | -45.8734 | Sao Paulo      | urban  | 2000-2014  |
| <b>São Miguel Paulista</b> | -23.4985 | -46.4448 | Sao Paulo      | urban  | 1998-2005  |
| <b>Sorocaba</b>            | -23.5024 | -47.479  | Sao Paulo      | urban  | 2000-2014  |
| <b>CongoFlux</b>           | 0.48     | 24.3     | Yangambi       | remote | 2019-2023  |
| <b>DRO Daintree</b>        | -16.1    | 145.4    | Daintree       | remote | 2020 -2023 |
| <b>Panama</b>              | 8.5      | -80.78   | Barro Colorado | remote | 2020-2022  |
| <b>T1</b>                  | -3.1002  | -59.977  | Amazonas       | urban  | 2016       |
| <b>T2</b>                  | -3.139   | -60.132  | Amazonas       | remote | 2014       |
| <b>T3</b>                  | -3.213   | -60.598  | Amazonas       | remote | 2014       |
| <b>T0z (K34)</b>           | -2.59    | -60.21   | Amazonas       | remote | 2009-2014  |
| <b>Porto Velho</b>         | -8.687   | -63.869  | Porto Velho    | remote | 2009-2012  |
| <b>Santarem</b>            | -2.85    | -54.967  | Santarem       | remote | 2015       |
| <b>Winnellie</b>           | -12.42   | 130.87   | Darwin         | urban  | 2012-2014  |
| <b>Palmerston</b>          | -12.48   | 130.98   | Darwin         | urban  | 2011-2014  |

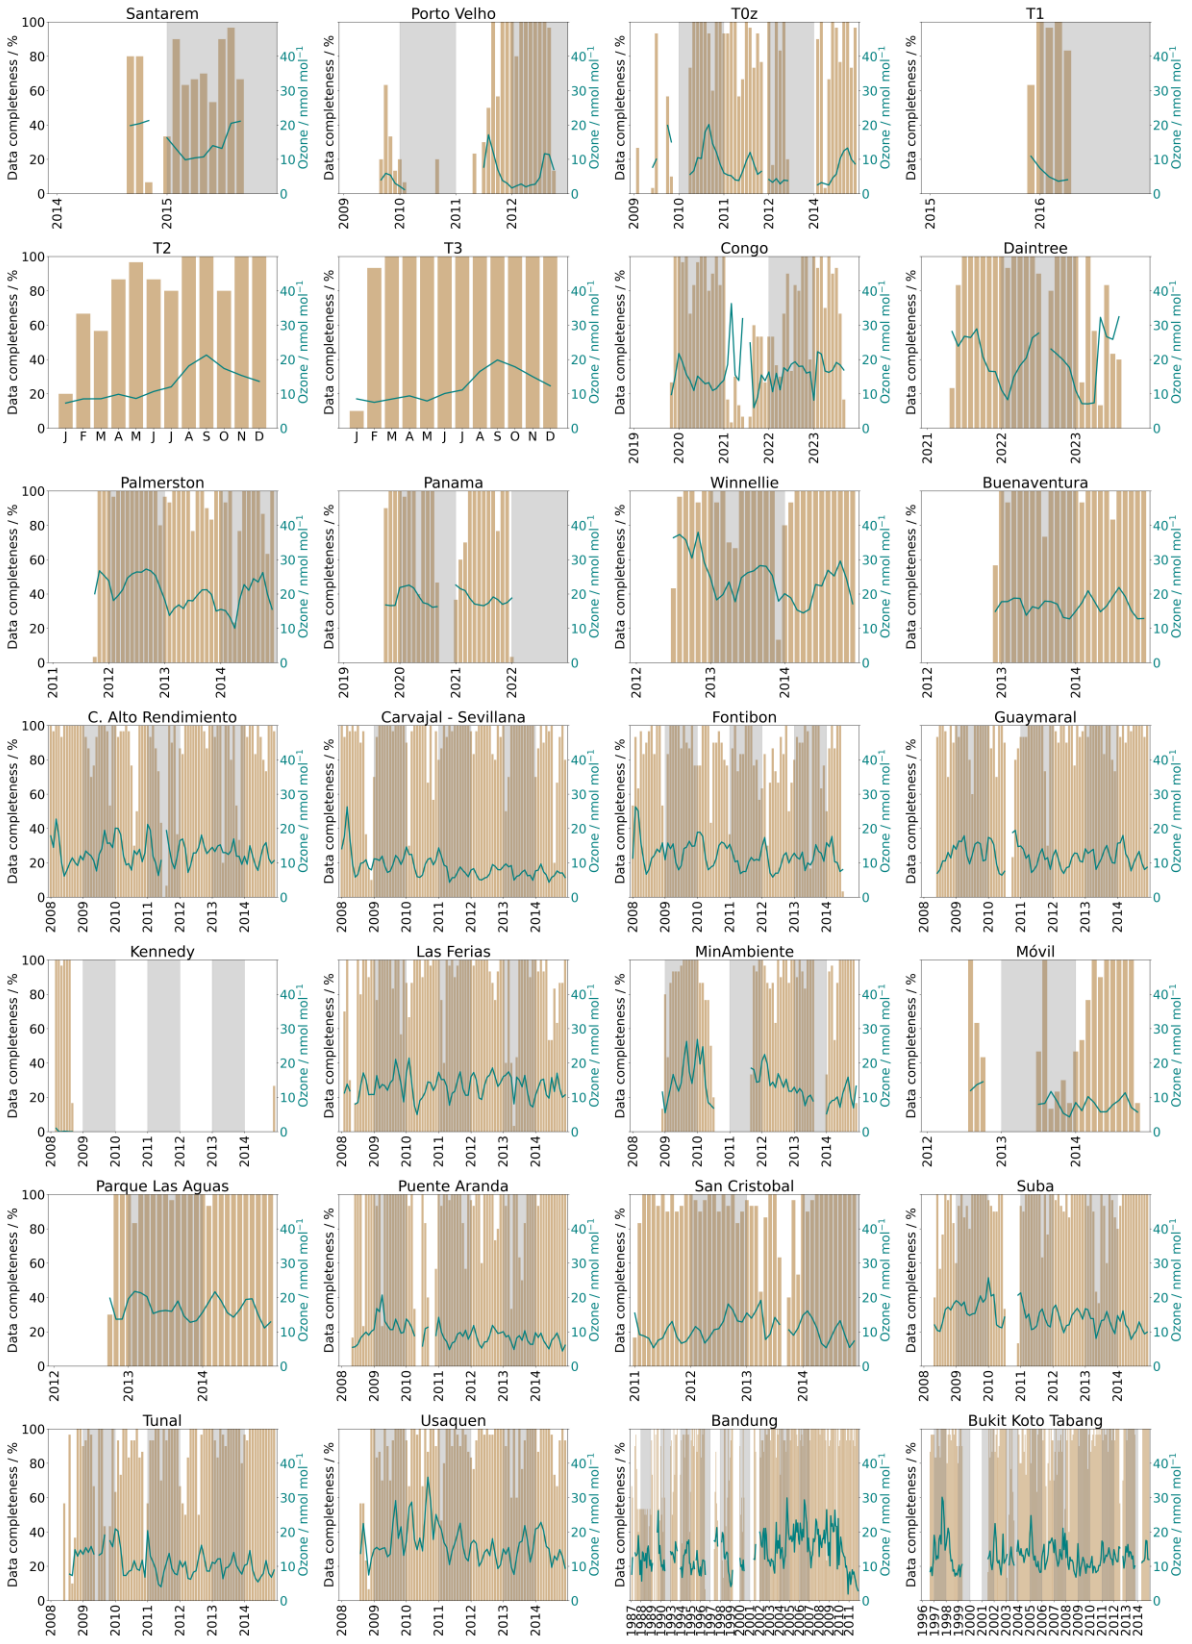

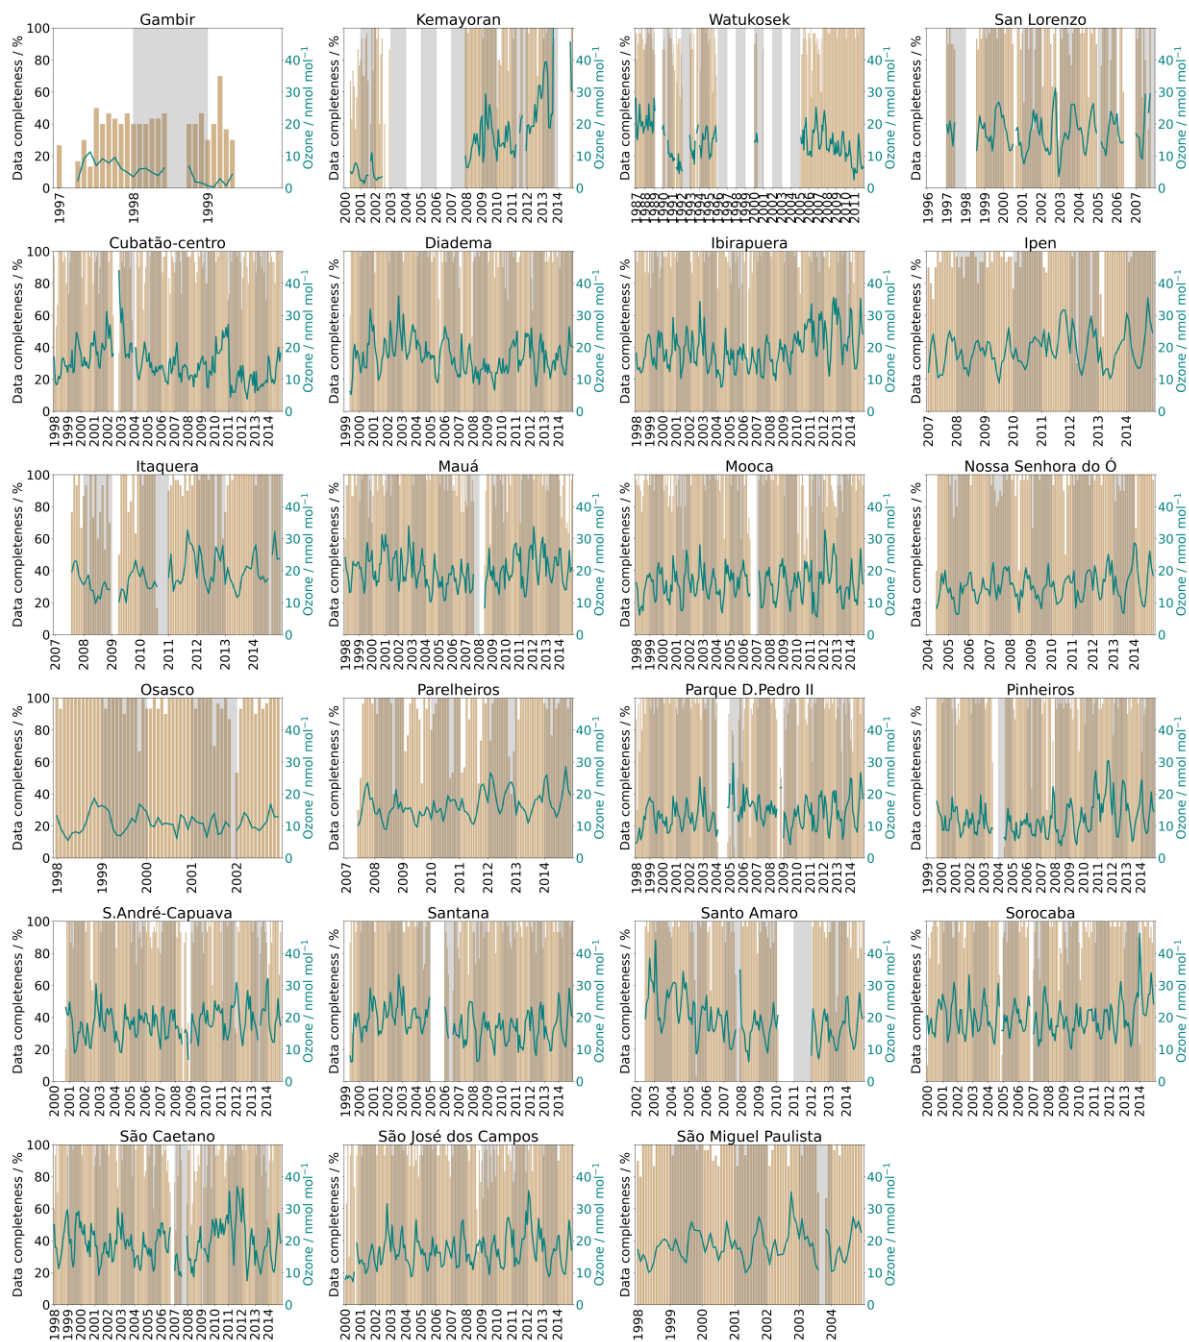

**Figure S1: Data completeness for individual stations in each month (gold bars) using daily data. Data is considered 100 % complete if there is data present for every day in a month. Grey shading covers every other year to help distinguish different years. The monthly mean ozone concentration is shown as a blue solid line.**



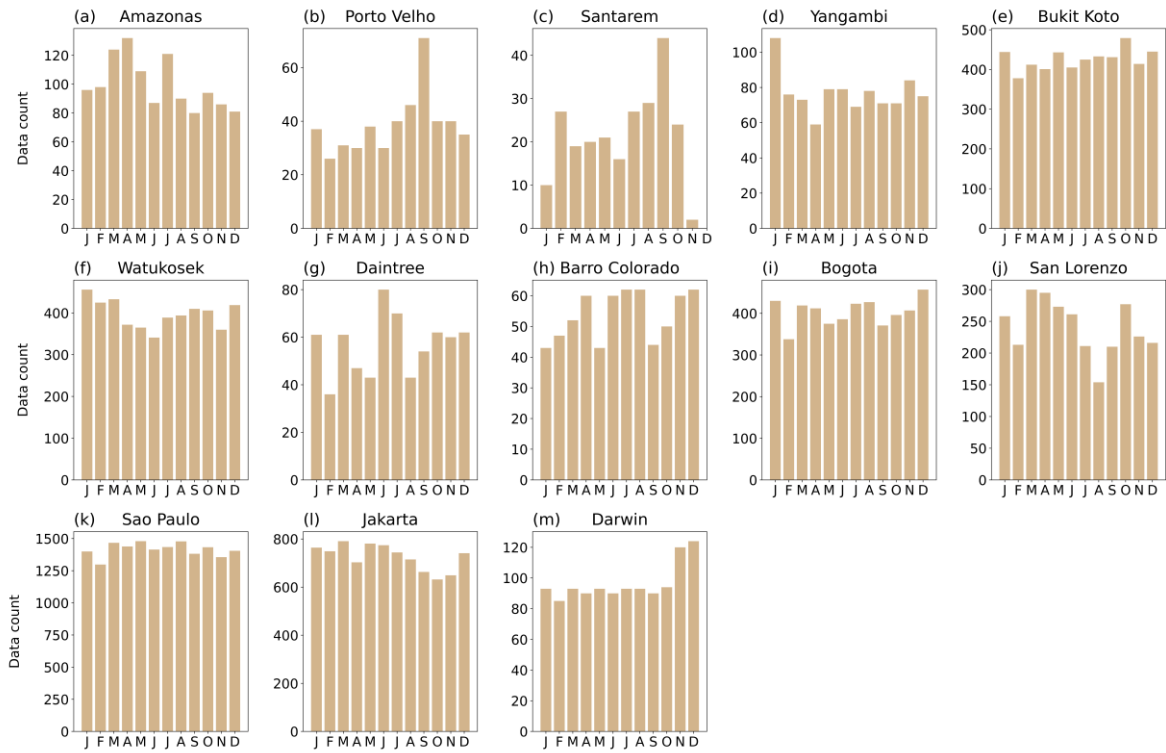

**Figure S2: The total number of days of data for each month at each site. This includes data from different years as well as different stations within each site.**

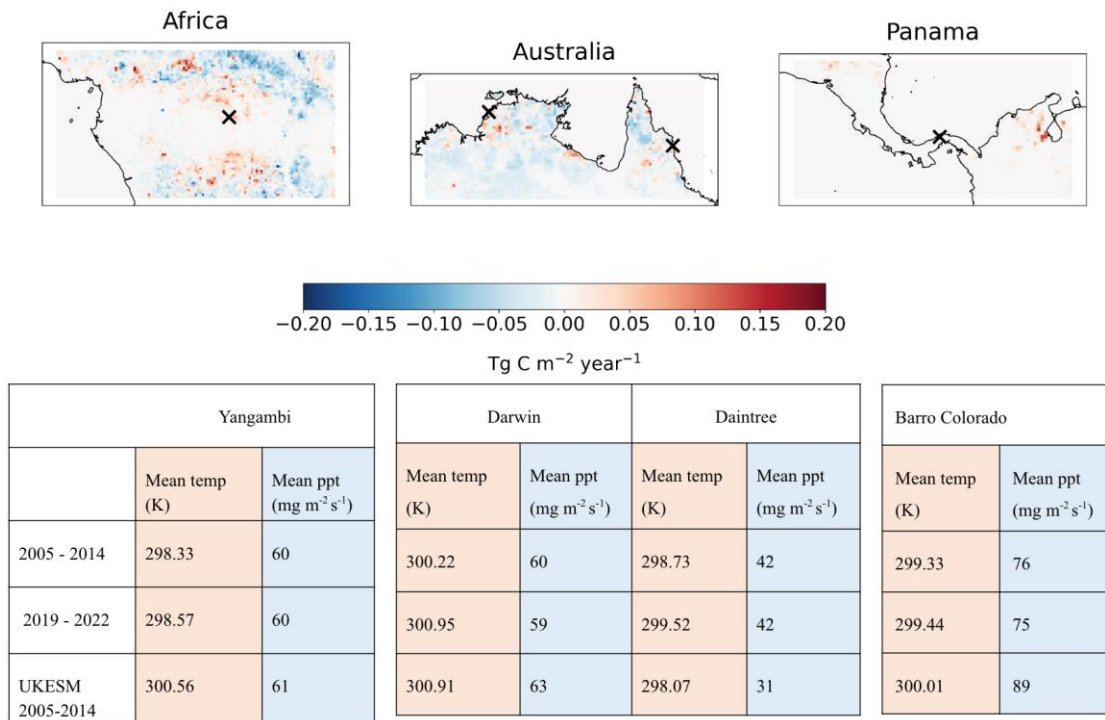

**Figure S3: The change in fire emissions between 2005 – 2014 and 2019 – 2022 in the area around the Congo site, the Darwin and Daintree sites and the Panama site. Tables below show the mean temperatures and precipitation rates for the grid cells containing each site using CRU-JRA reanalysis at the same resolution as UKESM1 and UKESM1 for the period 2005 – 2014.**

**Table S2: The gridcell mean and standard deviation in temperature for the period 2005 – 2014 from UKESM1 and CRU-JRA reanalysis. The final column given the difference between model and observations.**

| Site           | CRUJRA mean | UKESM1 mean | CRUJRA std | UKESM1 std | Difference (UKESM1 – CRUJRA) |
|----------------|-------------|-------------|------------|------------|------------------------------|
|                | °C          | °C          | °C         | °C         | °C                           |
| Porto Velho    | 20.9        | 22.0        | 0.2        | 0.6        | 1.1                          |
| Amazonas       | 22.1        | 23.4        | 0.2        | 0.6        | 1.3                          |
| Santarem       | 21.9        | 23.1        | 0.1        | 0.7        | 1.3                          |
| Yangambi       | 19.3        | 21.6        | 0.1        | 0.4        | 2.2                          |
| Bukit Koto     | 20.9        | 21.1        | 0.2        | 0.2        | 0.2                          |
| Watukosek      | 20.5        | 21.6        | 0.2        | 0.3        | 1.1                          |
| Daintree       | 19.7        | 19.0        | 0.4        | 0.3        | -0.7                         |
| Barro Colorado | 20.3        | 21.1        | 0.2        | 0.3        | 0.8                          |
| Bogota         | 13.9        | 14.7        | 0.3        | 0.4        | 0.8                          |
| San Lorenzo    | 17.4        | 16.8        | 0.4        | 0.8        | -0.6                         |
| Sao Paulo      | 13.9        | 14.3        | 0.3        | 0.3        | 0.4                          |
| Jakarta        | 20.4        | 21.6        | 0.1        | 0.2        | 1.2                          |
| Darwin         | 21.2        | 21.9        | 0.6        | 0.4        | 0.7                          |

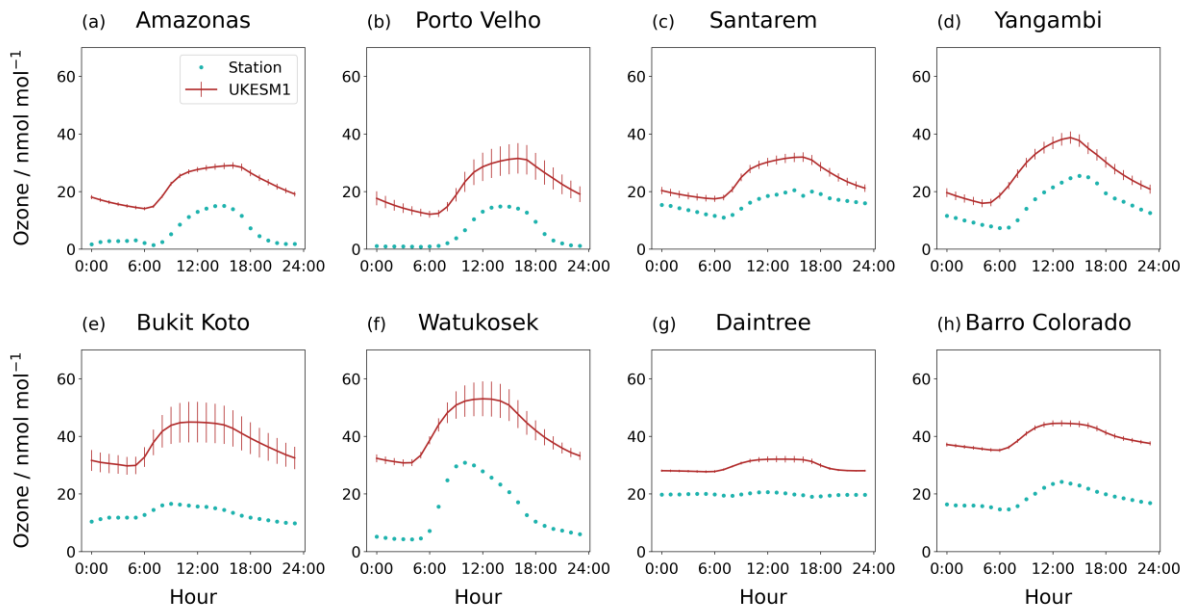

**Figure S4: Annual mean hourly ozone concentration at each site (blue dots) compared to in the corresponding gridcell of UKESM1 (red solid line). Vertical bars represent 1 standard deviation using annual diurnal cycles in UKESM1 to indicate interannual variability. Assessment of interannual variability was not possible for the observational datasets.**

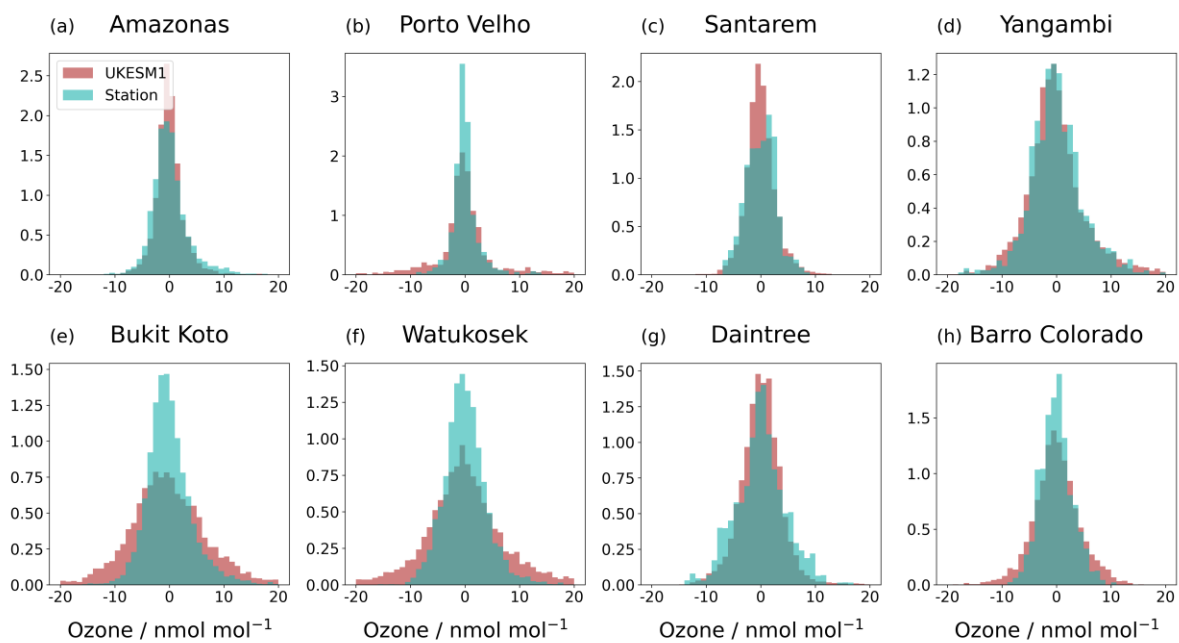

**Figure S5: Density plots showing the daily anomaly compared to the monthly mean for all months at each station (blue) compared to UKESM1 (red). Y-axis is the proportion of days such that the bars for each month sum to 1 (i.e. total bars sum to 12).**

**Table S3: Features of the distribution of daily anomaly compared to the monthly mean. Remote sites are shaded grey. Features that are underestimated by UKESM1 by more than 50% are shaded blue, features that are overestimated by more than 50% are shaded red. Features within this range are shaded green.**

| Gridcell name         | kurtosis | Kurtosis UKESM | skew | Skew UKESM | Standard deviation | Standard deviation UKESM |
|-----------------------|----------|----------------|------|------------|--------------------|--------------------------|
| <b>Bogota</b>         | 2.4      | 1.8            | 0.6  | 0.5        | 3.1                | 4.0                      |
| <b>Jakarta</b>        | 27.5     | 1.1            | 0.9  | 0.4        | 7.0                | 8.9                      |
| <b>Bukit Koto</b>     | 3.8      | 2.0            | 1.0  | 0.5        | 4.3                | 7.4                      |
| <b>Watukosek</b>      | 1.9      | 1.7            | 0.4  | 0.2        | 4.0                | 7.5                      |
| <b>San Lorenzo</b>    | 6.6      | 8.2            | 1.3  | 1.1        | 6.7                | 5.7                      |
| <b>Sao Paulo</b>      | 0.7      | 2.8            | 0.4  | 0.7        | 5.5                | 9.3                      |
| <b>Yangambi</b>       | 1.9      | 2.3            | 0.2  | 0.8        | 5.3                | 5.6                      |
| <b>Daintree</b>       | 0.7      | 3.5            | -0.1 | 0.4        | 4.8                | 3.8                      |
| <b>Barro Colorado</b> | 0.2      | 0.9            | 0.2  | -0.1       | 2.9                | 4.2                      |
| <b>Amazonas</b>       | 3.1      | 6.3            | 1.0  | 1.0        | 3.3                | 2.7                      |
| <b>Porto Velho</b>    | 5.2      | 7.9            | 1.3  | 0.3        | 2.8                | 7.3                      |
| <b>Santarem</b>       | 0.1      | 1.9            | 0.1  | 0.5        | 2.9                | 2.7                      |
| <b>Darwin</b>         | 1.7      | 4.9            | 0.4  | 1.0        | 4.9                | 5.7                      |

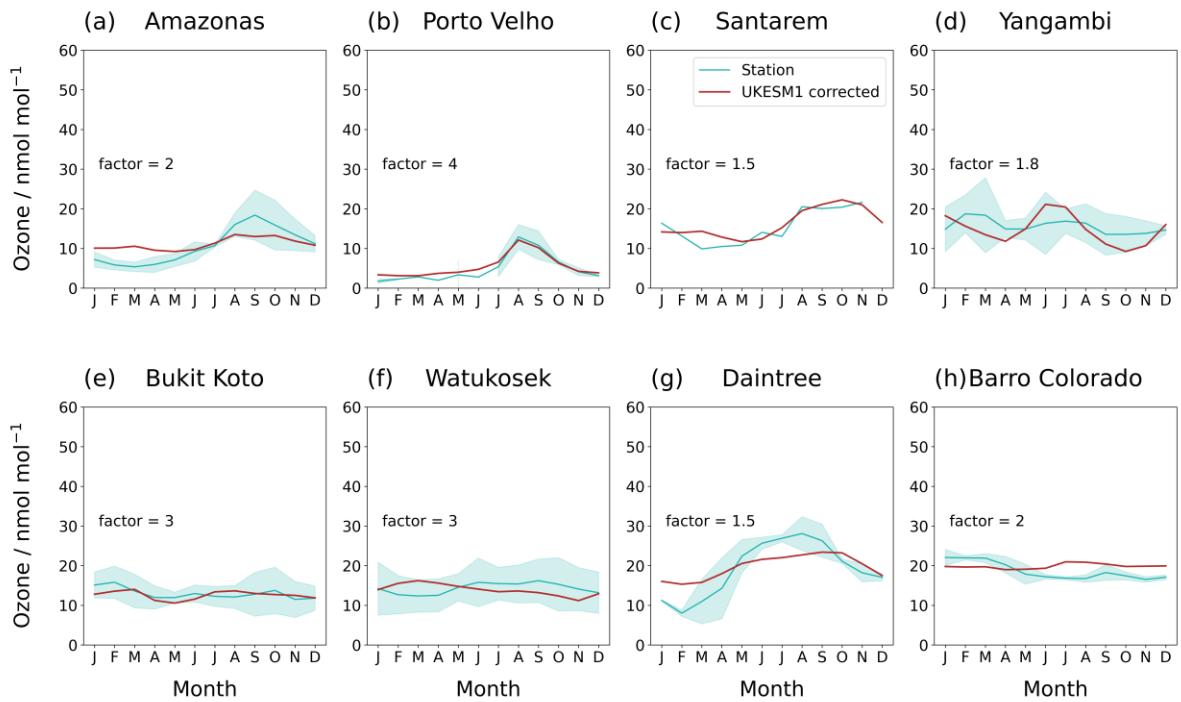

**Figure S6: Mean monthly ozone concentration at each station (blue solid line) compared to the corresponding gridcell of UKESM1 after bias correcting by a factor (red solid line). Shading covers 1 standard deviation using the observations to show interannual variability. The factor used in each bias correction is stated on each panel.**

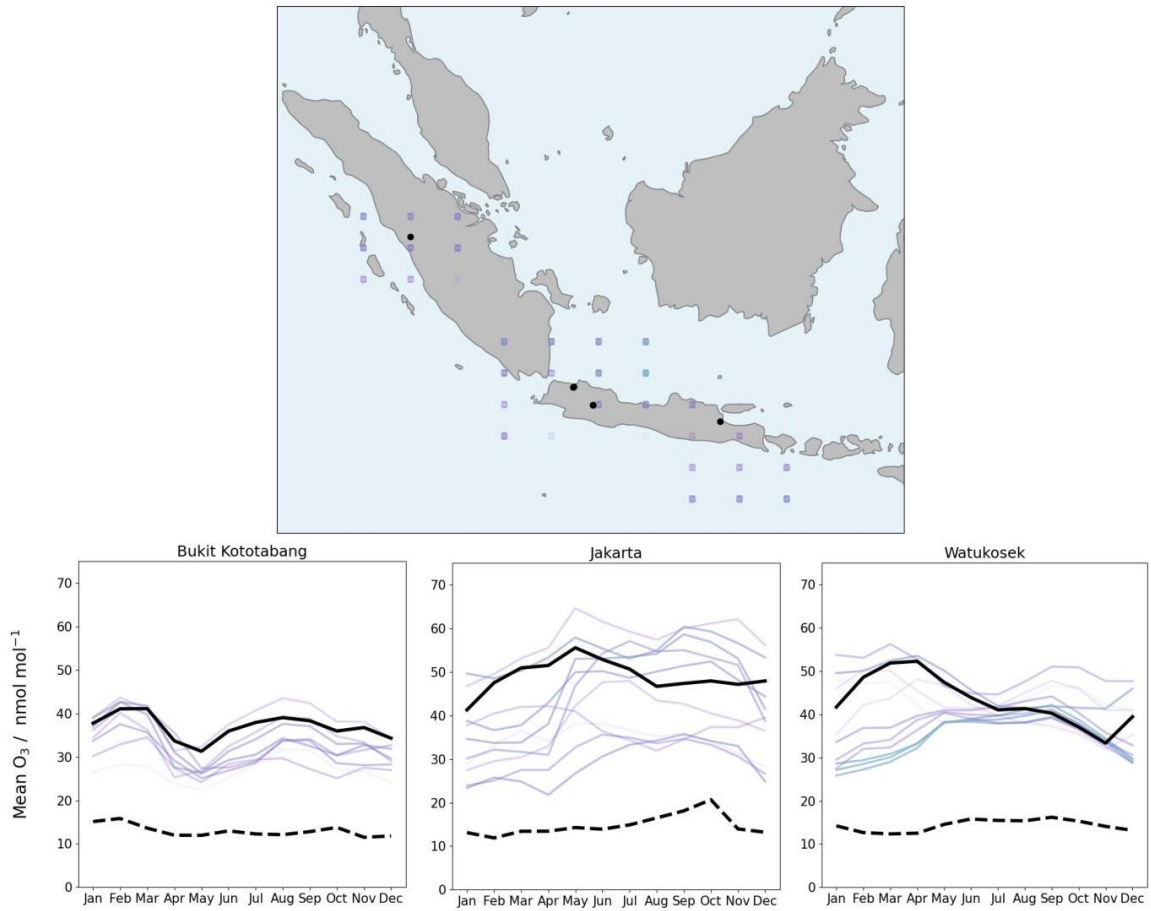

**Figure S7: Seasonal cycle of ozone concentrations from observations (black dashed line), at the gridcell containing the station (black solid line), and for the surrounding gridcells (solid coloured lines) for the three S. E. Asia sites in the study. Map above shows the station locations (black dots), and gridcells used in the analysis below (coloured squares) with gridcells coloured based on correlation with observations. The highest correlation are darker in tone and more blue.**

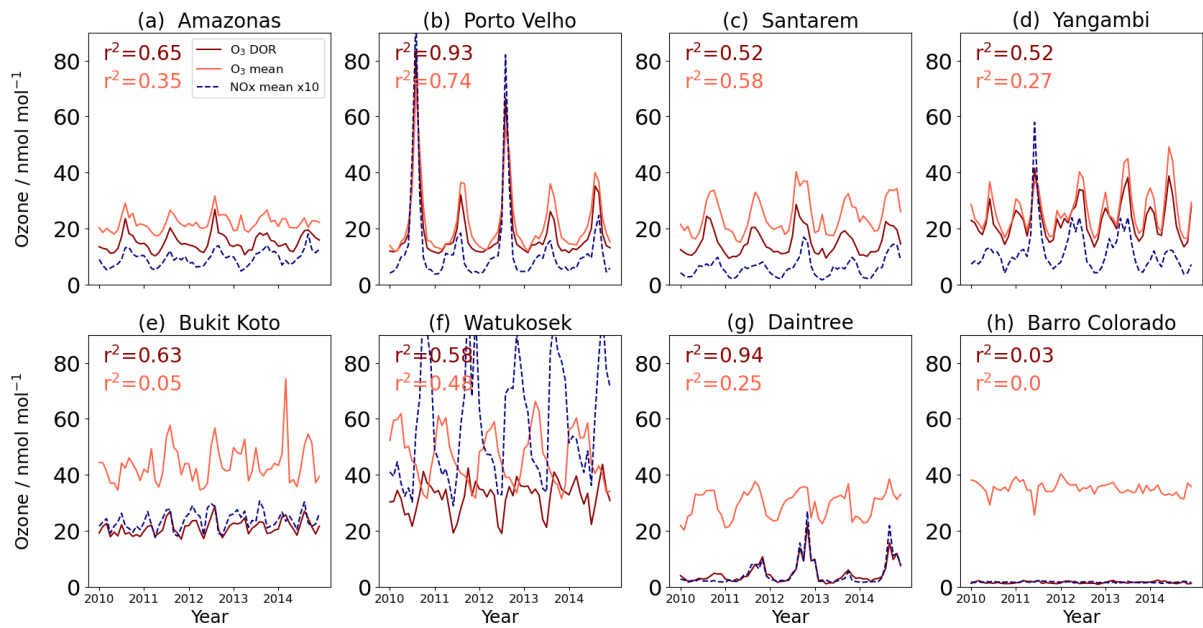

**Figure S8: Monthly mean data between 2010 – 2014 showing patterns in ozone concentrations (orange solid line), the DOR (red solid line) and NO<sub>x</sub> concentrations (x10, blue dashed line). r<sup>2</sup> values in the upper left corner gives the correlation between NO<sub>x</sub> and the DOR (red) or NO<sub>x</sub> and ozone (orange).**

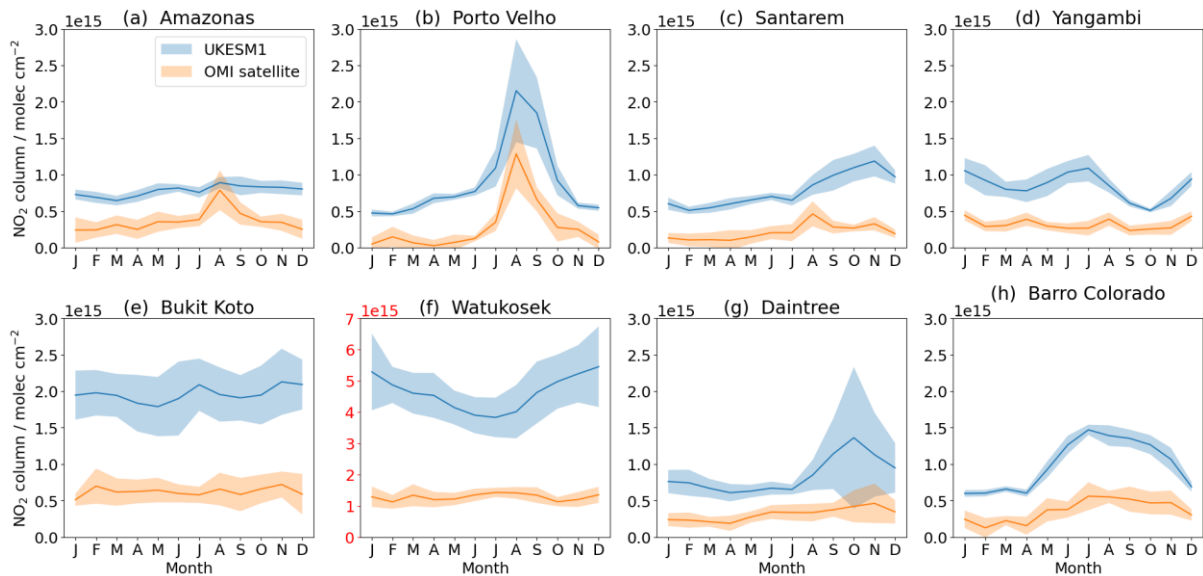

**Figure S9: Monthly mean tropospheric NO<sub>2</sub> columns between 2005 – 2014 at each site for UKESM1 (blue solid line) and OMI satellite (orange solid line). Shading covers 1 standard deviation using monthly means to represent interannual variability. Note the different scale used for Watukosek to improve readability.**

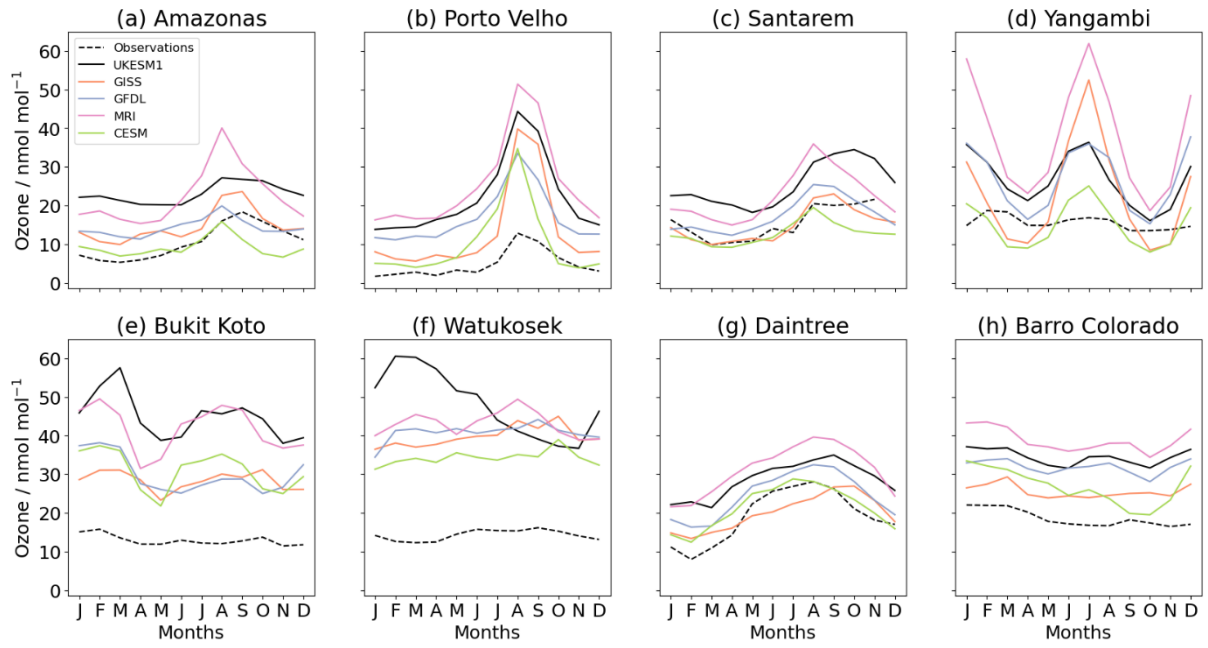

**Figure S10: Monthly mean ozone for the period 2005 – 2014 at each remote site for five Earth system models for comparison to UKESM1 (solid black line) and observations (black dashed line).**



## Amazonas stations

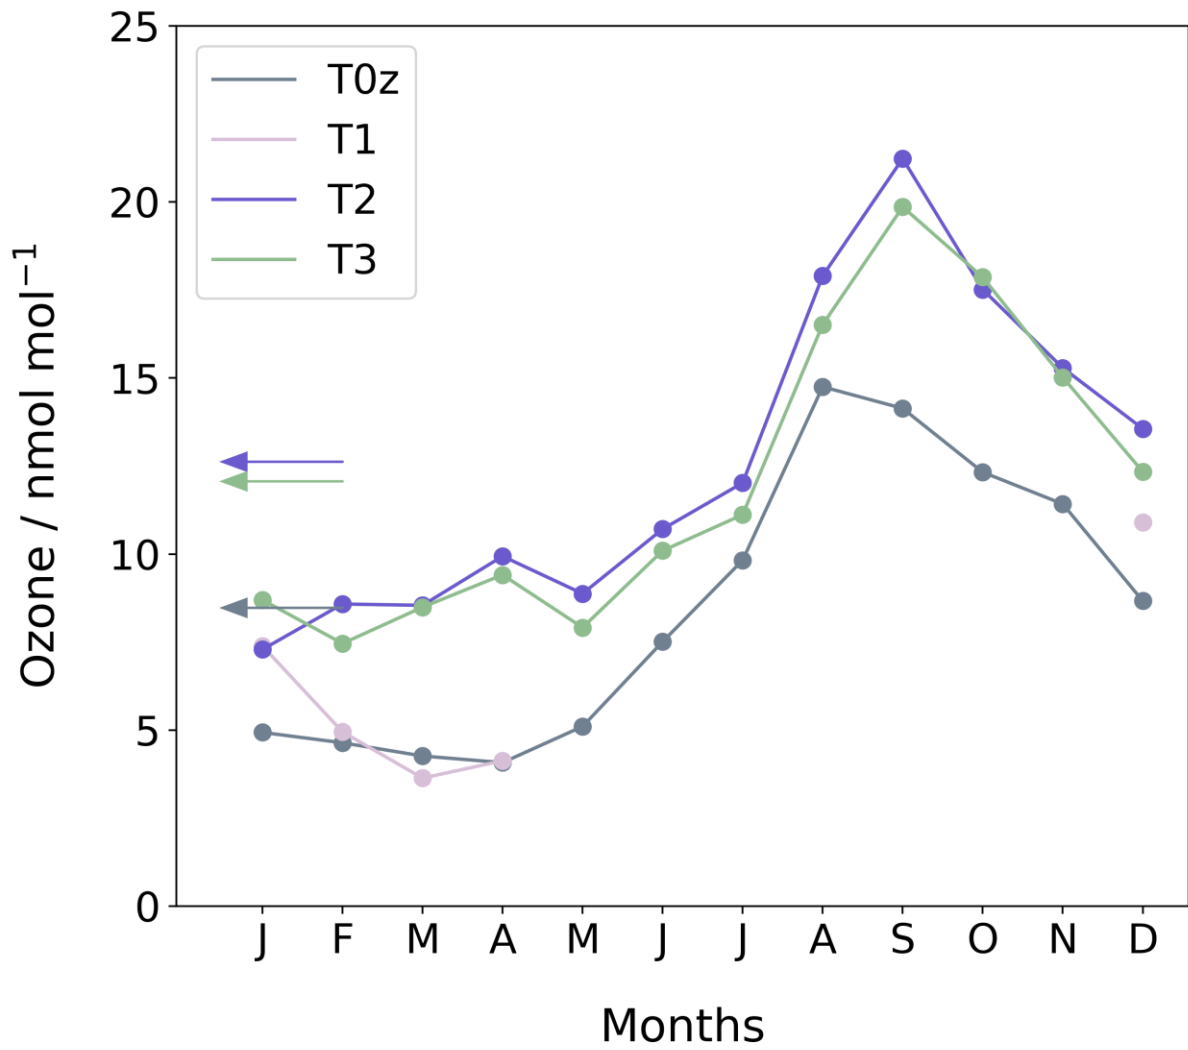

**Figure S11: Monthly mean ozone concentrations (solid lines) and annual mean ozone concentrations (arrows) from individual stations at the Amazonas site.**
